# Supplementary material for: Double-ratiometric fluorescence imaging of H2Se and O2˙− under hypoxia for exploring Na2SeO3-induced HepG2 cells' apoptosis
Source: Royal Society of Chemistry journal article supplement (doi:10.1039/c8ra08142e), 2018-01-01

## Supporting Information

### Double-ratiometric fluorescence imaging of $\text{H}_2\text{Se}$ and $\text{O}_2^{\cdot-}$ under hypoxia for exploring $\text{Na}_2\text{SeO}_3$ induced HepG2 cells' apoptosis

Xiaonan Gao,<sup>#</sup> Wenfei Guo,<sup>#</sup> Lihong Ge, Fanpeng Kong, Kehua Xu\* and Bo Tang\*

College of Chemistry, Chemical Engineering and Materials Science, Key Laboratory of Molecular and Nano Probes, Ministry of Education, Collaborative Innovation Center of Functionalized Probes for Chemical Imaging in Universities of Shandong, Shandong Normal University, Jinan 250014, P. R. China.

#### Contents

1. Excitation and emission spectra of NIR- $\text{H}_2\text{Se}$  with  $\text{H}_2\text{Se}$ , DHE with  $\text{O}_2^{\cdot-}$  and Rhodamine 110....S2
2. Confocal fluorescence images of endogenous  $\text{H}_2\text{Se}$  and  $\text{O}_2^{\cdot-}$  in living HepG2 cells treated with various concentrations of  $\text{Na}_2\text{SeO}_3$  under normoxic (20%  $\text{O}_2$ ) conditions.....S3
3. Confocal fluorescence images of endogenous  $\text{H}_2\text{Se}$  and  $\text{O}_2^{\cdot-}$  in living HepG2 cells treated with various concentrations of  $\text{Na}_2\text{SeO}_3$  under hypoxic (5%  $\text{O}_2$  and 1%  $\text{O}_2$ ) conditions.....S4
4. Scheme for the chemical formula of NIR- $\text{H}_2\text{Se}$ , DHE and their respective reaction product.....S6

1. Excitation and emission spectra of NIR-H<sub>2</sub>Se with H<sub>2</sub>Se, DHE with O<sub>2</sub><sup>•-</sup> and Rhodamine 110.

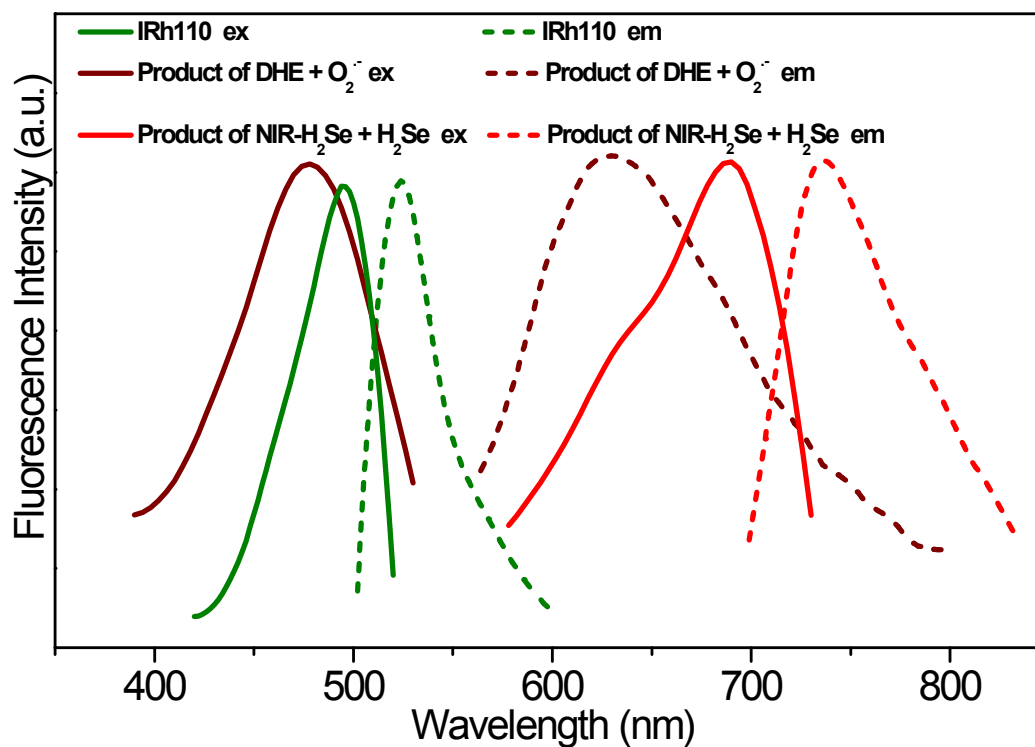

**Figure S1.** Excitation and emission spectra of the NIR-H<sub>2</sub>Se with H<sub>2</sub>Se, DHE with O<sub>2</sub><sup>•-</sup> and Rhodamine 110, and their excitation and emission wavelengths are as follows respectively:  $\lambda_{\text{ex}}/\lambda_{\text{em}} = 688/735$  nm,  $\lambda_{\text{ex}}/\lambda_{\text{em}} = 488/638$  nm,  $\lambda_{\text{ex}}/\lambda_{\text{em}} = 496/532$  nm.

---

2. Confocal fluorescence images of endogenous  $\text{H}_2\text{Se}$  and  $\text{O}_2^{\cdot-}$  in living HepG2 cells treated with various concentrations of  $\text{Na}_2\text{SeO}_3$  under normoxic (20%  $\text{O}_2$ ) conditions.

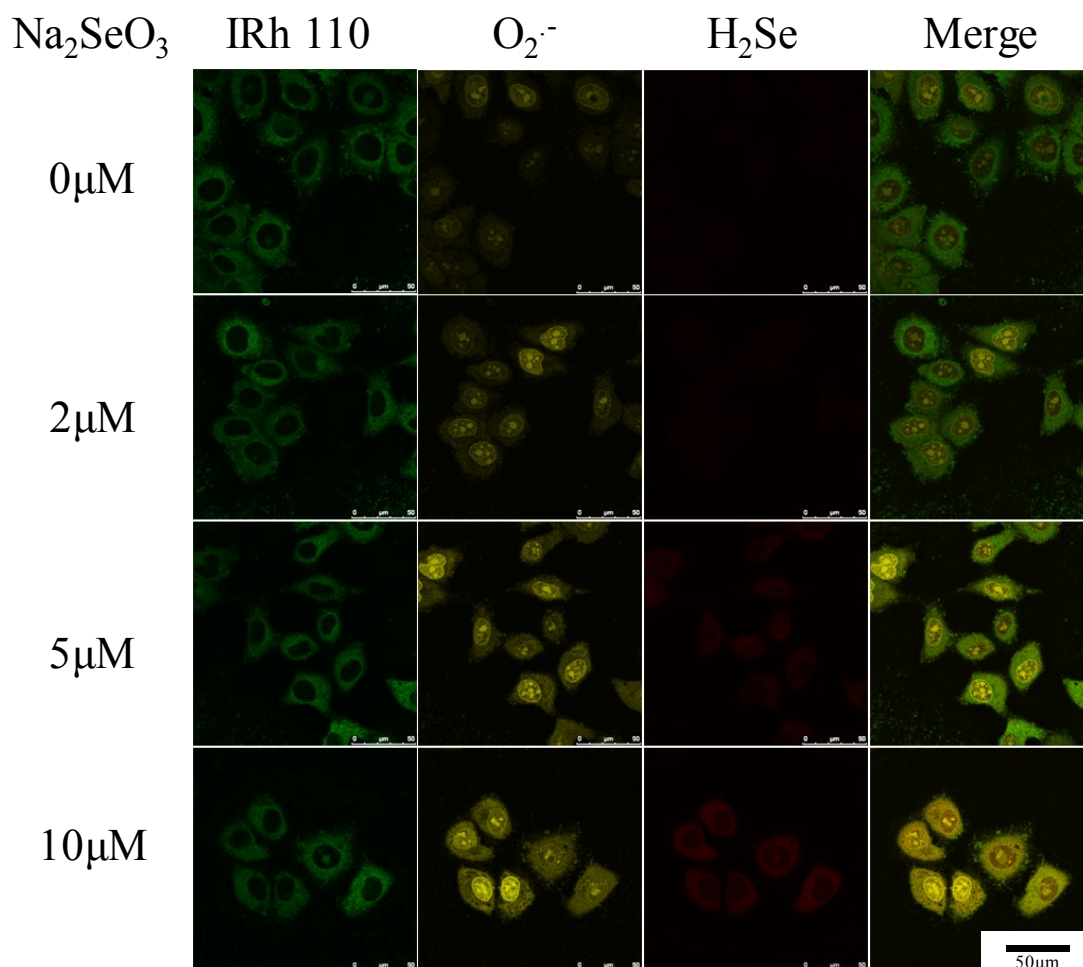

**Figure S2.** Confocal fluorescence images of endogenous  $\text{H}_2\text{Se}$  and  $\text{O}_2^{\cdot-}$  in living HepG2 cells treated with various concentrations of  $\text{Na}_2\text{SeO}_3$  under normoxic (20%  $\text{O}_2$ ) conditions. The living HepG2 cells were treated with various concentrations of  $\text{Na}_2\text{SeO}_3$  (0, 2, 5, 10  $\mu\text{M}$ ) for 12 h and then incubated with the mixture of 10  $\mu\text{M}$  NIR- $\text{H}_2\text{Se}$ , 5  $\mu\text{M}$  DHE and 1  $\mu\text{M}$  Rhodamine 110.

3. Confocal fluorescence images of endogenous  $\text{H}_2\text{Se}$  and  $\text{O}_2^{\cdot-}$  in living HepG2 cells treated with various concentrations of  $\text{Na}_2\text{SeO}_3$  under hypoxic (5%  $\text{O}_2$  and 1%  $\text{O}_2$ ) conditions.

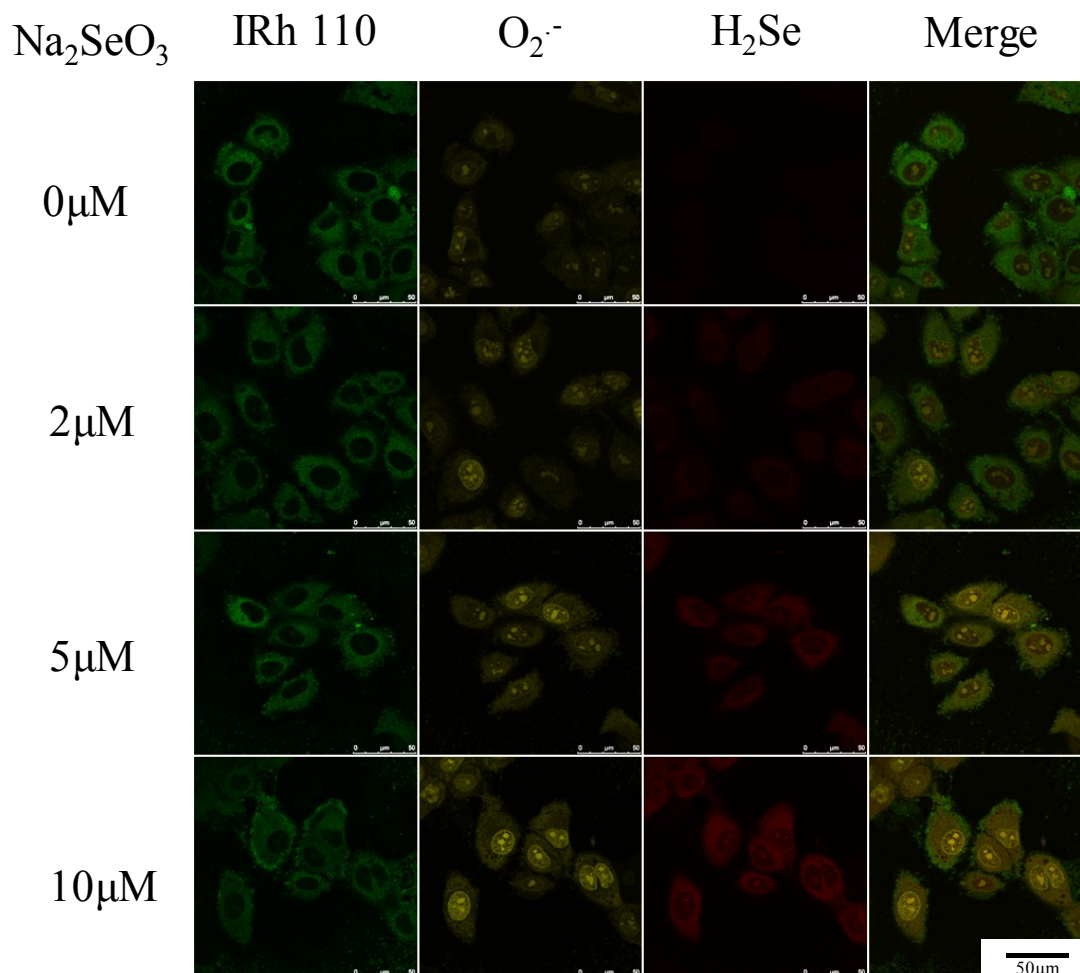

**Figure S3.** Confocal fluorescence images of endogenous  $\text{H}_2\text{Se}$  and  $\text{O}_2^{\cdot-}$  in living HepG2 cells treated with various concentrations of  $\text{Na}_2\text{SeO}_3$  under hypoxic (5%  $\text{O}_2$ ) conditions. The living HepG2 cells were treated with various concentrations of  $\text{Na}_2\text{SeO}_3$  (0, 2, 5, 10  $\mu\text{M}$ ) for 12 h and then incubated with the mixture of 10  $\mu\text{M}$  NIR- $\text{H}_2\text{Se}$ , 5  $\mu\text{M}$  DHE and 1  $\mu\text{M}$  Rhodamine 110.

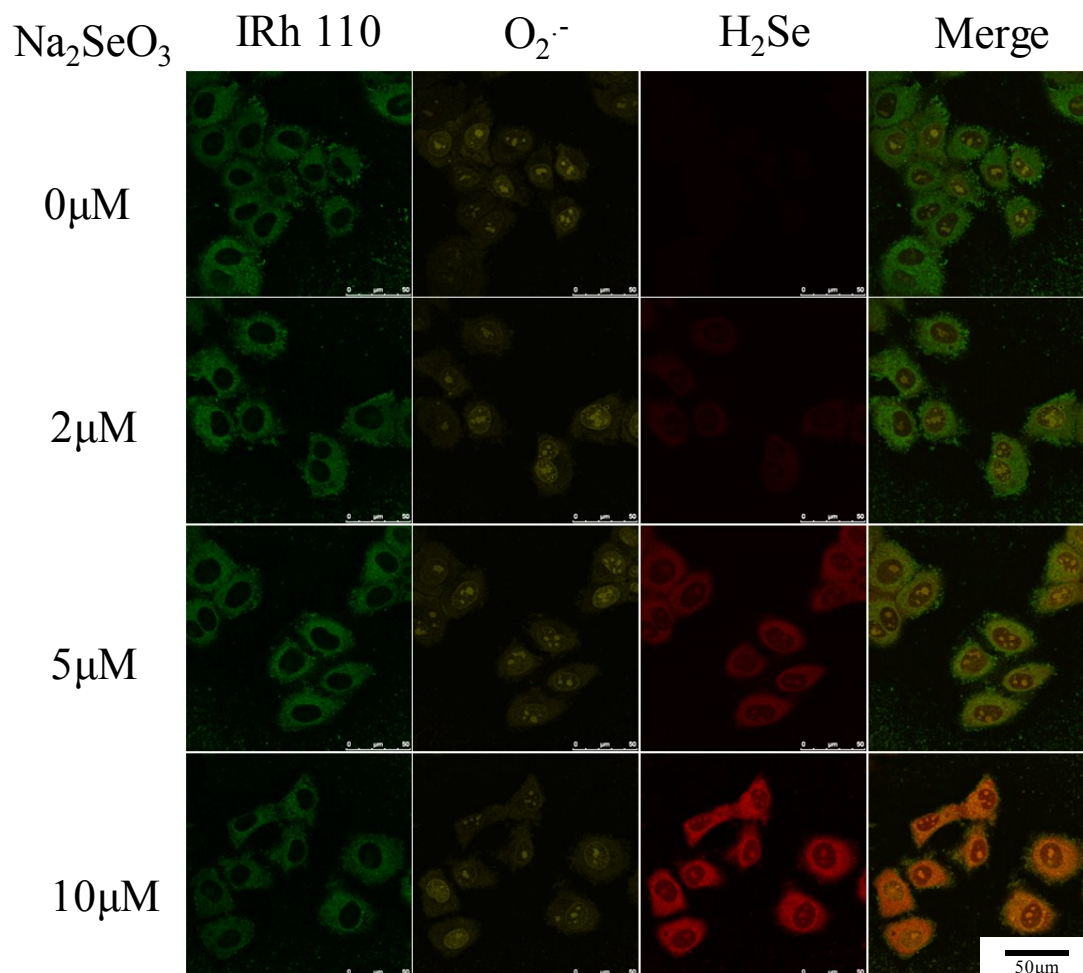

**Figure S4.** Confocal fluorescence images of endogenous  $\text{H}_2\text{Se}$  and  $\text{O}_2^{\cdot-}$  in living HepG2 cells treated with various concentrations of  $\text{Na}_2\text{SeO}_3$  under hypoxic (1%  $\text{O}_2$ ) conditions. The living HepG2 cells were treated with various concentrations of  $\text{Na}_2\text{SeO}_3$  (0, 2, 5, 10  $\mu\text{M}$ ) for 12 h and then incubated with the mixture of 10  $\mu\text{M}$  NIR- $\text{H}_2\text{Se}$ , 5  $\mu\text{M}$  DHE and 1  $\mu\text{M}$  Rhodamine 110.

4. **Scheme S1:** The chemical formula of NIR-H<sub>2</sub>Se, DHE and their respective reaction product.

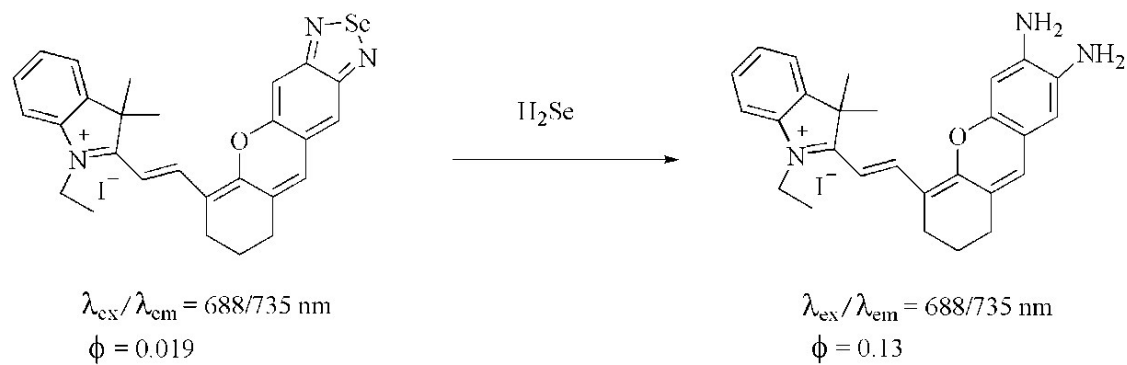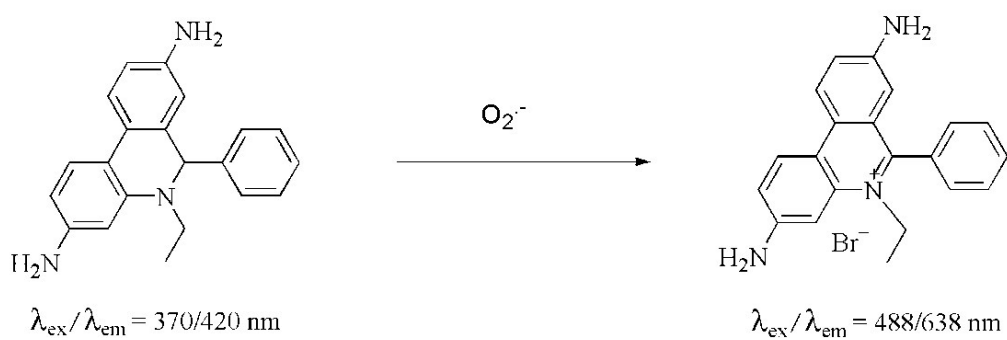

Supplement: c8ra08142e1.pdf [file c8ra08142e1.pdf]
